# Supplementary material
Source: PubMed Central journal article supplement (PMC5070891)
Supplement: ejhg2015240x1.pdf [file ejhg2015240x1.pdf]

## SUPPLEMENTARY FILE

**Table S1.** Exome sequencing summary data

|                         | <b>Case 1</b> | <b>Case 5</b> | <b>Case 9</b> |
|-------------------------|---------------|---------------|---------------|
| Total reads             | 105 898 538   | 140 882 234   | 120 519 058   |
| Total aligned reads     | 101 729 359   | 139 641 721   | 119 375 959   |
| Mean read length        | 93.05         | 97.99         | 96.92         |
| Mean coverage           | 107.01X       | 149.8X        | 131.45X       |
| Coverage in CCDS region |               |               |               |
| 5X                      | 97.70%        | 97.90%        | 96.90%        |
| 10X                     | 97.00%        | 97.40%        | 95.20%        |
| 20X                     | 94.80%        | 96.20%        | 91.80%        |
| 30X                     | 91.20%        | 94.40%        | 88.50%        |

**Table S2.** Filtering strategy employed to identify the causative variants in *SPG7*

|                                                                                      | <b>Case 1</b> | <b>Case 5</b> | <b>Case 9</b> |
|--------------------------------------------------------------------------------------|---------------|---------------|---------------|
| Total variants                                                                       | 195 088       | 285 572       | 278 372       |
| Non-synonymous/splicing/indel variants                                               | 11 876        | 11 756        | 11 955        |
| After excluding variants reported in 1000genomes and EVS datasets (frequency >3%)    | 1 878         | 1 761         | 1 926         |
| After excluding variants observed in our in-house database (frequency >1.5%)         | 484           | 357           | 430           |
| Genes with homozygous or compound heterozygous variants                              | 43            | 18            | 24            |
| Genes with variants not homozygous or compound heterozygous in our in-house database | 22            | 12            | 14            |
| Gene associated with an ataxia phenotype                                             | 1             | 2*            | 1             |

\**SYNE1* and *SPG7*

**Table S3.** Genotypes of SNPs in patients with the p.(Ala510Val) mutation in *SPG7*

| SNP ID   | rs11076708 | rs564705   | rs12447947 | A510V      | rs258327   | rs461115   | rs7200990  | rs3809643  | rs7196459  |
|----------|------------|------------|------------|------------|------------|------------|------------|------------|------------|
| Position | 88 808 141 | 88 946 955 | 89 199 651 | 89 613 145 | 89 629 218 | 89 703 519 | 89 836 507 | 90 124 273 | 90 141 477 |
| Case 1   | C          | A          | G          | C          | G          | T          | T          | T          | G          |
|          | C          | G          | A          | T          | G          | T          | C          | T          | G          |
| Case 5   | C          | G          | A          | C          | G          | T          | C          | G          | G          |
|          | C          | G          | A          | T          | G          | T          | C          | T          | G          |
| Case 9   | T          | G          | A          | C          | G          | T          | T          | T          | G          |
|          | T          | G          | A          | T          | G          | T          | C          | T          | G          |

\*Reference sequence hg19
